# Supplementary material
Source: PubMed Central journal article supplement (PMC2896778)
Supplement: mmc1.pdf [file mmc1.pdf]

American Journal of Human Genetics, Volume 87

Supplemental Data

**Mutation of the Mitochondrial Tyrosyl-tRNA Synthetase Gene, *YARS2*, Causes Myopathy, Lactic Acidosis, and Sideroblastic Anaemia—MLASA Syndrome**

**Lisa G. Riley, Sandra Cooper, Peter Hickey, Joëlle Rudinger-Thirion, Matthew McKenzie, Alison Compton, Sze Chern Lim, David Thorburn, Michael T. Ryan, Richard Giegé, Melanie Bahlo, and John Christodoulou**

**Figure S1. Haplotype Map of Family 1 Pedigree in the Linkage Region Surrounding *YARS2***

The positions of the SNPs on chromosome 12 are shown on the left in cM. The location of *YARS2* is indicated by a dotted line.

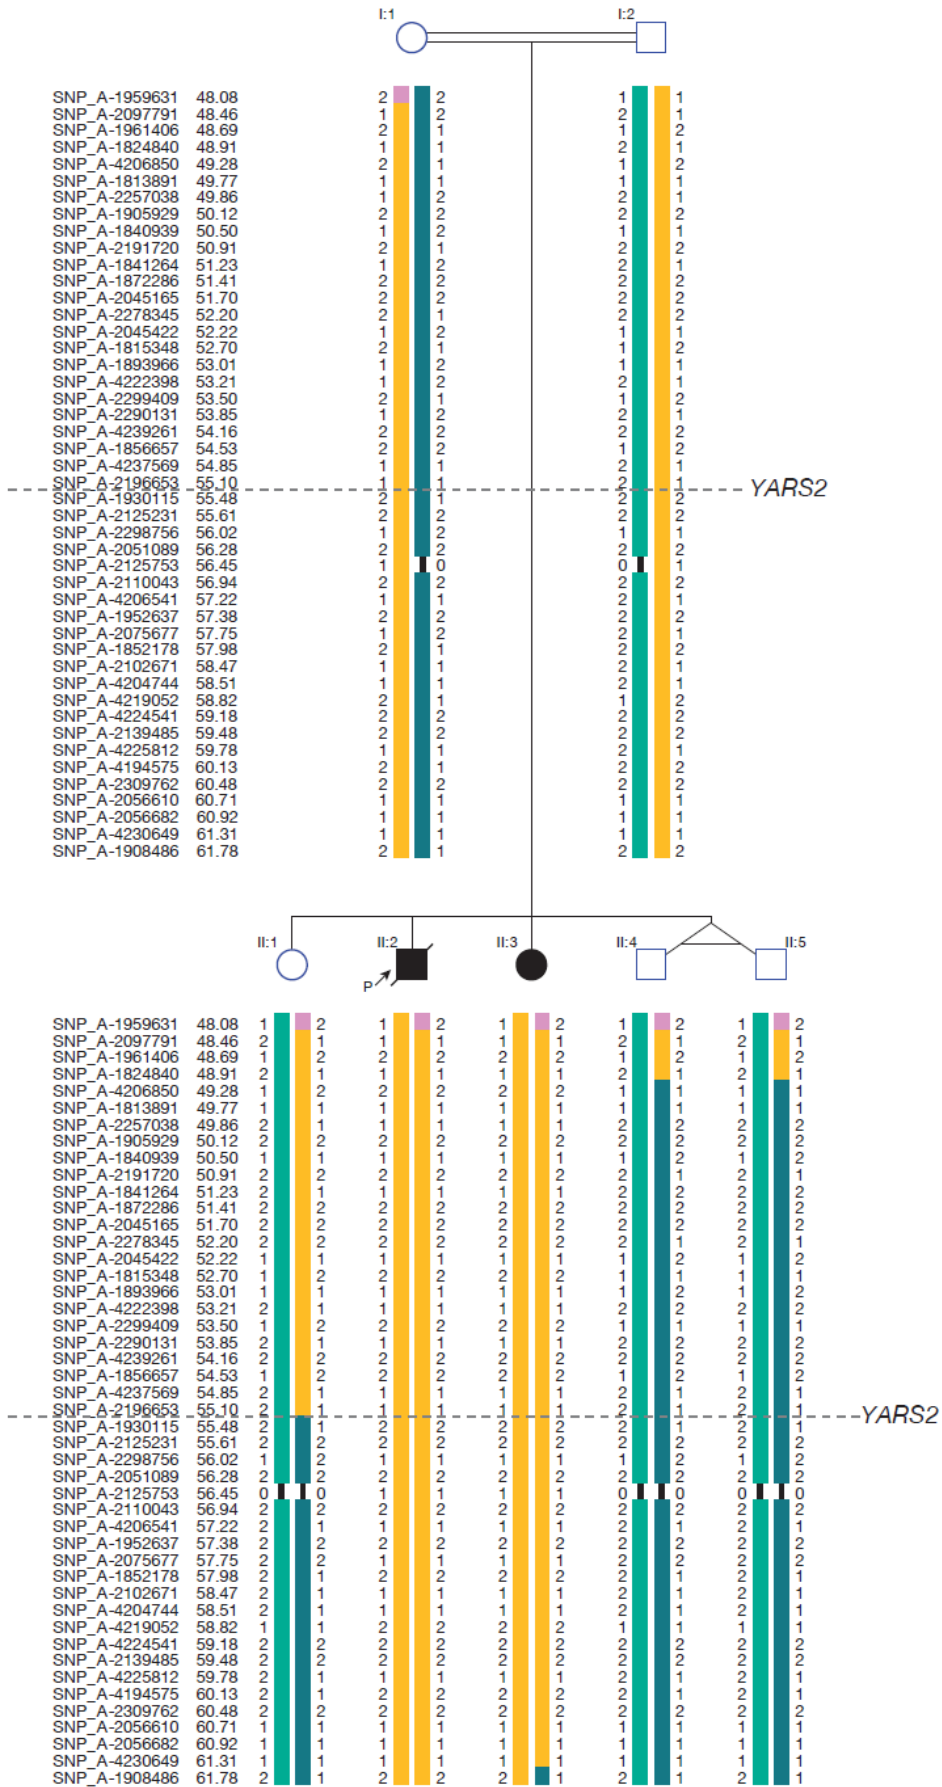

**Figure S2. Effect of the YARS2 Mutation on Fibroblast RC Protein Expression**

Immunoblot analysis of YARS2 and the RC complexes in patient fibroblasts (P1 = Family 2, P2 = II:3) and control cell lines (C1, C2). A 1 min exposure of specific subunits of the five RC complexes (I-V) detected by the anti-OXPHOS cocktail are shown on one blot. An additional shorter exposure (5s) of Complex V subunit  $\alpha$  is shown for clarity. Note that these subunits are labile if the RC complex is not fully assembled. GAPDH and mitofilin were used as loading controls. Five  $\mu\text{g}$  total protein was loaded and equivalent loadings also confirmed by Coomassie staining (not shown).

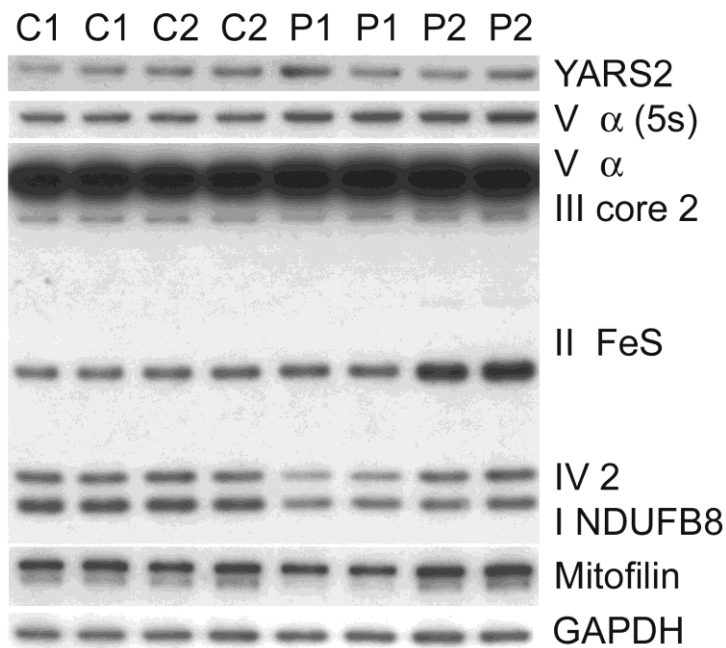

**Figure S3. Effect of the YASR2 Mutation on Mitochondrial Protein Synthesis in Fibroblasts**

SDS-PAGE of [<sup>35</sup>S]-methionine labelled mitochondrial extracts from patient (P1 = Family 2, P2 = II:3) and control (C1,C2) fibroblasts. Mitochondrial encoded subunits of Complex I (ND1, ND2, ND3), Complex III (CYB), Complex IV (CO1, CO2, CO3) and Complex V (ATP6, ATP8) are shown.

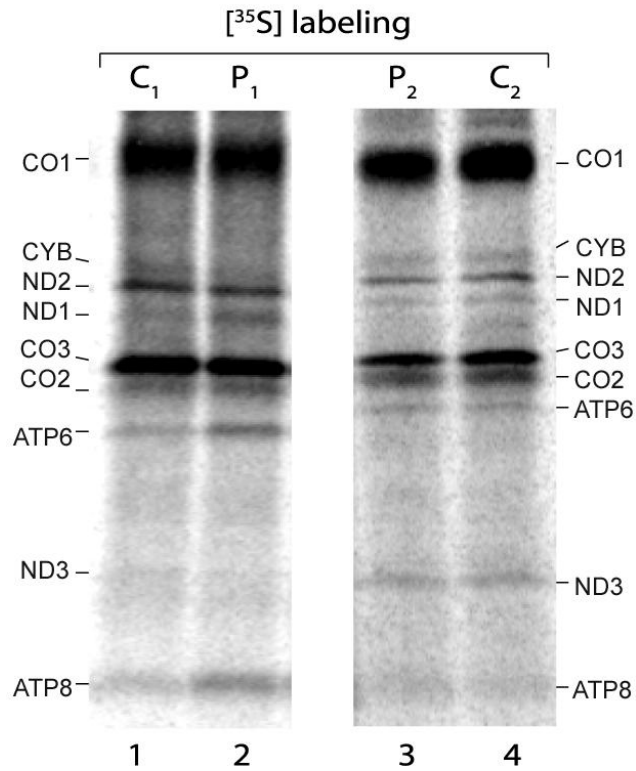

**Table S1. Genome-wide SNP Analysis of MLASA Family 1**

Locations of homozygous regions identified from genome wide SNP analysis of Family 1 and genes from within these regions that are in the MitoCarta database.

| Region | Max LOD Score | Chromosome | Cytogenetic Position | Chromosomal Distance (cM) | Physical Map Position               | MitoCarta Genes in the Region                                                                                                                                               |
|--------|---------------|------------|----------------------|---------------------------|-------------------------------------|-----------------------------------------------------------------------------------------------------------------------------------------------------------------------------|
| 1      | 2.056         | 2          | p25.1-p25.3          | 9.34-19.94                | Chr2:<br>4,150,663-<br>8,121,771    | -                                                                                                                                                                           |
| 2      | 2.056         | 8          | q12.1-<br>q24.12     | 69.32-85.77               | Chr8:<br>58,104,662-<br>121,759,445 | ARMC1<br>MTFR1<br>ADHFE1<br>LACTB2<br>TMEM70<br>MRPS28<br>FAM82B<br>DECR1<br>PP2MC<br>C8orf38<br>UQCRB<br>MTERFD1<br>HRSP12<br>COX6C<br>SLC25A32<br>OXR1<br>TTC35<br>MRPL13 |
| 3      | 2.056         | 12         | p12.1-<br>q13.11     | 48.08-61.31               | Chr12:<br>25,925,670-<br>45,929,450 | MRPS35<br>TMTC1<br>LOC645619<br>YARS2<br>ABCD2                                                                                                                              |
| 4      | 2.056         | 18         | p11.31-<br>q12.1     | 20.18-52.58               | Chr18:<br>6,358,842-<br>25,199,329  | NDUFV2<br>AFG3L2<br>C18orf43<br>C18orf19                                                                                                                                    |
| 5      | 2.056         | 19         | p13.3                | 6.94-12.54                | Chr19:<br>2,363,978-<br>3,615,344   | TIMM13                                                                                                                                                                      |
